# Supplementary material for: Comparative effectiveness of warfarin, dabigatran, rivaroxaban and apixaban in non-valvular atrial fibrillation: A nationwide pharmacoepidemiological study
Source: PubMed Central journal article supplement (PMC6709911; doi:10.1371/journal.pone.0221500), 2019-08-26
Supplement: pone.0221500.s002.pdf [file pone.0221500.s002.pdf]

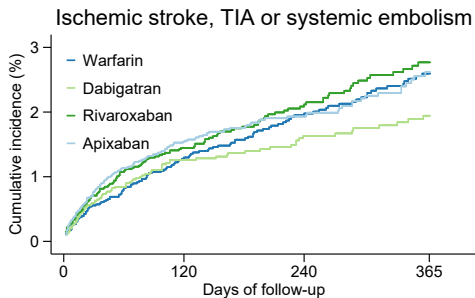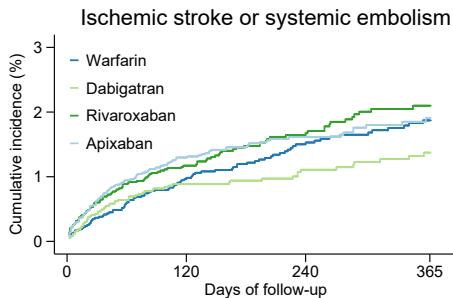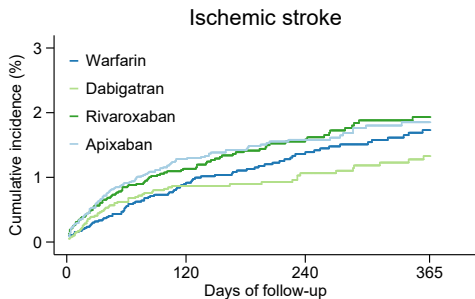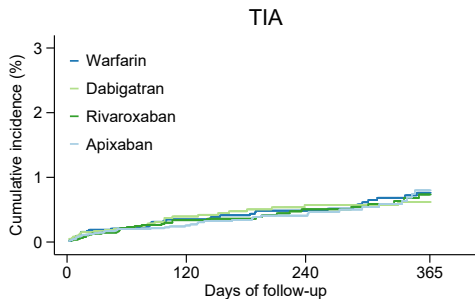

**S1 Fig. Cumulative incidence of effectiveness outcomes** Cumulative incidence of effectiveness outcomes associated with use of oral anticoagulants for non-valvular atrial fibrillation during one year of follow-up in Norway between 15 July 2013 and 31 December 2015. TIA, transient ischemic attack.
