# Supplementary material for: Comparative effectiveness of warfarin, dabigatran, rivaroxaban and apixaban in non-valvular atrial fibrillation: A nationwide pharmacoepidemiological study
Source: PubMed Central journal article supplement (PMC6709911; doi:10.1371/journal.pone.0221500), 2019-08-26
Supplement: pone.0221500.s004.pdf [file pone.0221500.s004.pdf]

### Major or clinically relevant non-major bleeding

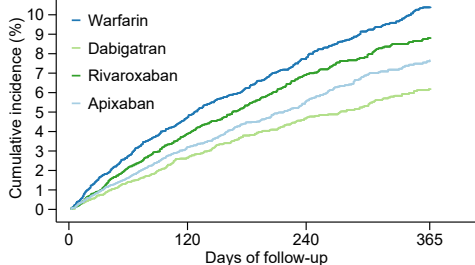

### Intracranial bleeding

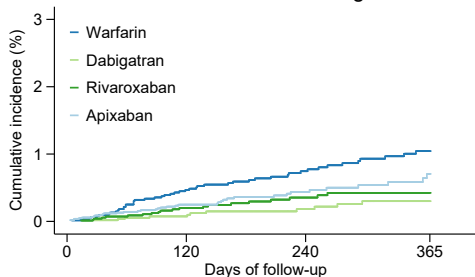

### Gastrointestinal bleeding

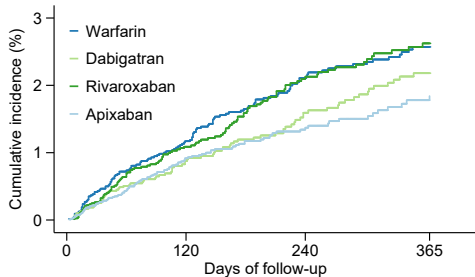

### Other bleeding

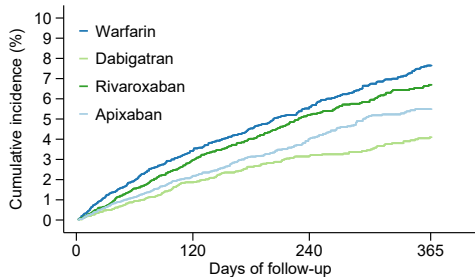

**S3 Fig. Cumulative incidence of safety outcomes** Cumulative incidence of safety outcomes associated with use of oral anticoagulants for non-valvular atrial fibrillation during one year of follow-up between Norway 15 July 2015 and 31 December 2015.
