# Supplementary material for: Comparative effectiveness of warfarin, dabigatran, rivaroxaban and apixaban in non-valvular atrial fibrillation: A nationwide pharmacoepidemiological study
Source: PubMed Central journal article supplement (PMC6709911; doi:10.1371/journal.pone.0221500), 2019-08-26
Supplement: pone.0221500.s006.pdf [file pone.0221500.s006.pdf]

**S1 Table.** Definition of inclusion and exclusion criteria

|                                                                                  | <b>Data source</b> | <b>Note</b>                                                                            |
|----------------------------------------------------------------------------------|--------------------|----------------------------------------------------------------------------------------|
| <b>Inclusion criteria</b>                                                        |                    |                                                                                        |
| Warfarin                                                                         | NorPD              | ATC code B01AA03                                                                       |
| Dabigatran                                                                       | NorPD              | ATC code B01AE07                                                                       |
| Rivaroxaban                                                                      | NorPD              | ATC code B01AF01                                                                       |
| Apixaban                                                                         | NorPD              | ATC code B01AF02                                                                       |
| Atrial fibrillation                                                              | NorPD              | Reimbursement code I48 (ICD-10) or K78 (ICPC-2) on first oral anticoagulant dispensing |
| <b>Exclusion criteria</b>                                                        |                    |                                                                                        |
| Mitral stenosis                                                                  | NPR                | ICD-10 diagnosis code I05.x                                                            |
| Heart valve prosthesis                                                           | NPR                | ICD-10 diagnosis code Z95.2, Z95.3 or Z95.4                                            |
| Differing OACs dispensed on index date                                           | NorPD              |                                                                                        |
| Differing reimbursement codes if same OAC dispensed more than once on index date | NorPD              |                                                                                        |
| Age <18 on index date                                                            | NR                 |                                                                                        |
| Uncertain resident status                                                        | NR                 |                                                                                        |

ICD-10: International Classification of Diseases, 10th revision  
 ICPC-2: International Classification of Primary Care, 2nd Edition  
 NPR: Norwegian Patient Registry  
 NorPD: Norwegian Prescription Database  
 NR: National Registry
