# Supplementary material for: Comparative effectiveness of warfarin, dabigatran, rivaroxaban and apixaban in non-valvular atrial fibrillation: A nationwide pharmacoepidemiological study
Source: PubMed Central journal article supplement (PMC6709911; doi:10.1371/journal.pone.0221500), 2019-08-26
Supplement: pone.0221500.s007.pdf [file pone.0221500.s007.pdf]

**S2 Table.** Definition of study outcomes

| Outcome                                                                | ICD-10 code in NPR/NCoDR                                                                                                                  | Cause of death | Hospitalization   |                     | Out-patient visit |                     |
|------------------------------------------------------------------------|-------------------------------------------------------------------------------------------------------------------------------------------|----------------|-------------------|---------------------|-------------------|---------------------|
|                                                                        |                                                                                                                                           |                | Primary diagnosis | Secondary diagnosis | Primary diagnosis | Secondary diagnosis |
| <b>Ischemic stroke, transient ischemic attack or systemic embolism</b> | Composite of ischemic stroke, transient ischemic attack and systemic embolism as defined below                                            |                |                   |                     |                   |                     |
| <b>Ischemic stroke or systemic embolism</b>                            | Composite of ischemic stroke and systemic embolism as defined below                                                                       |                |                   |                     |                   |                     |
| <b>Ischemic stroke</b>                                                 | I63.x I64.x                                                                                                                               | x              | x                 | x                   |                   |                     |
| <b>Transient ischemic attack</b>                                       | G45.x                                                                                                                                     |                | x                 | x                   |                   |                     |
| <b>Systemic embolism</b>                                               | I74.x                                                                                                                                     | x              | x                 | x                   |                   |                     |
| <b>Major or clinically relevant non-major bleeding</b>                 | Combined outcome of intracranial, gastrointestinal and other bleeding as defined below                                                    |                |                   |                     |                   |                     |
| <b>Intracranial bleeding</b>                                           | I60.x I61.x I62.x S06.4 S06.5 S06.6                                                                                                       | x              | x                 | x                   |                   |                     |
| <b>Gastrointestinal bleeding</b>                                       | I85.0 I98.3 K25.0 K25.2 K25.4 K25.6 K26.0 K26.2 K26.4 K26.6 K27.0 K27.2 K27.4 K27.6 K28.0 K28.2 K28.4 K28.6 K29.0 K62.5 K92.0 K92.1 K92.2 | x              | x                 | x                   | x                 | x                   |
| <b>Other bleeding</b>                                                  | D62.x D68.3 H31.3 H35.6 H43.1 H45.0 I23.0 I31.2 J94.2 K66.1 M25.0 N42.1 N83.6 N83.7 N85.7 N89.7 N92.x N93.x N95.0 R04.x R31.x R58.x       | x              | x                 | x                   | x                 | x                   |
| <b>Pneumonia</b>                                                       | A48.1 J10.0 J11.0 J12.x J13.x J14.x J15.x J16.x J17.x J18.x J85.1                                                                         | x              | x                 | x                   |                   |                     |

Codes from the Norwegian Patient Register (NPR) includes both primary and secondary diagnoses from hospital admissions (and/or outpatient visits if specified). Codes from the Norwegian Cause of Death Register (NCoDR) include those registered as the underlying cause of death.
