# Supplementary material for: Comparative effectiveness of warfarin, dabigatran, rivaroxaban and apixaban in non-valvular atrial fibrillation: A nationwide pharmacoepidemiological study
Source: PubMed Central journal article supplement (PMC6709911; doi:10.1371/journal.pone.0221500), 2019-08-26
Supplement: pone.0221500.s008.pdf [file pone.0221500.s008.pdf]

**S3 Table.** Definition of covariates

| Variable                                            | Norwegian Patient Registry                                                                                                                                     | Norwegian Prescription Database                             |              |                     |
|-----------------------------------------------------|----------------------------------------------------------------------------------------------------------------------------------------------------------------|-------------------------------------------------------------|--------------|---------------------|
|                                                     | ICD-10 codes                                                                                                                                                   | Reimbursement codes                                         |              | ATC codes           |
|                                                     |                                                                                                                                                                | ICD-10 codes                                                | ICPC-2 codes |                     |
| <b>Medical history (last 5 years)</b>               |                                                                                                                                                                |                                                             |              |                     |
| §Congestive heart failure                           | I11.0 I42.x I50.x J81.x                                                                                                                                        | I11.0 I42 I50 I50.1 J81                                     | K77          |                     |
| §Hypertension                                       | I10 I11.x I12.x I13.x I15.x<br>O10.x O11.x                                                                                                                     | I10 I11 I11.0 I12 I13<br>I15 O10 O11                        | K86 K87      |                     |
| §Diabetes mellitus                                  | E10.x E11.x E13.x E14.x O24.0<br>O24.1 O24.3                                                                                                                   | E10 E10.2 E11 E112<br>E13 E14                               | T89 T90      |                     |
| §Previous ischemic stroke, TIA or systemic embolism | G45.x I63.x I64.x I69.3 I69.4<br>I74.x                                                                                                                         | G45 I63 I74                                                 | K89 K90      |                     |
| §History of acute myocardial infarction             | I21.x I22.x I23.x                                                                                                                                              | -22 I21 I22                                                 | -22 K75      |                     |
| §Atherosclerosis or peripheral artery disease       | I70.x I73.9                                                                                                                                                    | I70 I70.2 I73.9                                             | K92          |                     |
| §History of intracranial bleeding                   | I60.x I61.x I62.x I69.0 I69.1<br>I69.2 S06.4 S06.5 S06.6                                                                                                       |                                                             |              |                     |
| §History of gastrointestinal bleeding               | I85.0 I98.3 K22.6 K25.0 K25.2<br>K25.4 K25.6 K26.0 K26.2 K26.4<br>K26.6 K27.0 K27.2 K27.4 K27.6<br>K28.0 K28.2 K28.4 K28.6 K29.0<br>K62.5 K92.0 K92.1 K92.2    |                                                             |              |                     |
| §History of other bleeding                          | D62 D68.3 H31.3 H35.6 H43.1<br>H45.0 I23.0 I31.2 J94.2 K66.1<br>M25.0 N42.1 N83.6 N83.7<br>N85.7 N89.7 N92.0 N92.1<br>N92.3 N92.4 N93.x N95.0<br>R04.x R31 R58 |                                                             |              |                     |
| §Liver disease                                      | B17.0 B18.x I85.x I86.4 I98.2<br>I98.3 K70.x K71.x K72.x K73.x<br>K74.x K75.x K76.x K77.x T86.4<br>Z94.4                                                       | K70 K71 K72 K74<br>K754 K76                                 | D97          |                     |
| §Chronic kidney disease                             | I12.x I13.x N00.x N01.x N02.x<br>N03.x N04.x N05.x N07.x<br>N11.x N14.x N17.x N18.x N19<br>N25.0 Q61.x T86.1 Z49.x Z94.0<br>Z99.2                              | I12 I13 N00 N01 N03<br>N04 N05 N11 N14<br>N18 N25 Q61 Z99.2 | U88          |                     |
| §Alcohol misuse                                     | E24.4 F10.x G31.2 G62.1<br>G72.1 I42.6 K29.2 K70.x K85.2<br>K86.0 O35.4 P04.3 R78.0<br>T51.x Y90.x Y91.x Z50.2 Z71.4<br>Z72.1                                  | F10.5 K70                                                   | P15          | N07BB<br>(≠N07BB04) |
| Other valvular heart disease                        | I06.x I07.x I08.x I34.x I35.x<br>I36.x I37.x I38.x I39.x                                                                                                       | I34 I35 I36 I37                                             | K83          |                     |
| Pacemaker, defibrillator                            | Z45.0 Z95.0                                                                                                                                                    |                                                             |              |                     |
| Disease in precerebral or cerebral artery           | I65.x I66.x I67.x I72.0 I72.5<br>I72.6 Q28.0 Q28.1 Q28.2<br>Q28.3                                                                                              | I65 I66 I67                                                 | K91          |                     |
| Venous thromboembolism                              | I26.x I80.1 I80.2 I80.3 I80.8<br>I80.9 I81 I82.x                                                                                                               | I26 I80 I81 I82                                             | K93 K94      |                     |
| Coagulation / platelet defects                      | D65 D66 D67 D68.x D69.x                                                                                                                                        | D65 D66 D67 D68<br>D68.1 D68.2 D68.3                        | B83          |                     |

|                                                                            |                                                        |                                                                                                            |                    |                                          |
|----------------------------------------------------------------------------|--------------------------------------------------------|------------------------------------------------------------------------------------------------------------|--------------------|------------------------------------------|
|                                                                            |                                                        | D68.4 D68.8 D68.9<br>D69 D69.1 D69.3                                                                       |                    |                                          |
| Esophagitis, gastritis, duodenitis, acid reflux or peptic ulcer            | K20 K21.x K22.1 K22.7 K25.x<br>K26.x K27.x K28.x K29.x | K20 K21 K25 K26                                                                                            | D84 D85<br>D86     |                                          |
| Inflammatory bowel disease                                                 | K50.x K51.x                                            | K50 K51 K51.2                                                                                              | D94                |                                          |
| Anemia                                                                     | D5* D60.x D61.x D62 D63.x<br>D64.x                     | D51 D59                                                                                                    | B81 B82            |                                          |
| Undernourished or vitamin deficiency                                       | E4* E5* E60 E61 E63 E64                                | E53.8                                                                                                      | T91                |                                          |
| Osteoporosis                                                               | M80.x M81.x M82.x                                      | M80 M81                                                                                                    | L95                |                                          |
| Fall                                                                       | W0n.x                                                  |                                                                                                            |                    |                                          |
| Delirium                                                                   | F05.x                                                  |                                                                                                            |                    |                                          |
| Dementia                                                                   | F00.x F01.x F02.x F03.x F05.1<br>G30.x G31.1           |                                                                                                            |                    | N06DA02<br>N06DA03<br>N06DA04<br>N06DX01 |
| Cancer                                                                     | C* (÷C44.x) D45                                        |                                                                                                            |                    |                                          |
| Chronic pulmonary disease                                                  | I27.x J4* J70.x J84.x J92.x<br>J96.x E66.2 J98.2 J98.3 | I27 J40 J41 J42 J43 J44<br>J45 J47 J84 J84.1                                                               | K82 R79<br>R95 R96 |                                          |
| <b>Prescription drug use (last 6 months)</b>                               |                                                        |                                                                                                            |                    |                                          |
| <sup>§</sup> Nonsteroidal anti-inflammatory drug                           |                                                        |                                                                                                            |                    | M01A N02BA01                             |
| <sup>§</sup> Platelet aggregation inhibitor or acetylsalicylic acid        |                                                        |                                                                                                            |                    | B01AC                                    |
| Angiotensin converting enzyme (ACE) inhibitor or angiotensin II antagonist |                                                        |                                                                                                            |                    | C09A C09B C09C<br>C09D                   |
| Antiarrhythmic                                                             |                                                        |                                                                                                            |                    | C01B                                     |
| Beta blocking agent                                                        |                                                        |                                                                                                            |                    | C07                                      |
| Calcium channel blocker                                                    |                                                        |                                                                                                            |                    | C08C C08D                                |
| Digitoxin / digoxin                                                        |                                                        |                                                                                                            |                    | C01AA04 C01AA05                          |
| Diuretics                                                                  |                                                        |                                                                                                            |                    | C03A C03C C03D<br>C03E                   |
| Lipid modifying agent                                                      |                                                        |                                                                                                            |                    | C10                                      |
| Nitrate                                                                    |                                                        |                                                                                                            |                    | C01DA                                    |
| Antacids, H2-receptor antagonist or proton pump inhibitor                  |                                                        |                                                                                                            |                    | A02A A02BA<br>A02BC                      |
| Glucocorticoids                                                            |                                                        |                                                                                                            |                    | H02AB                                    |
| Antidepressant                                                             |                                                        |                                                                                                            |                    | N06A                                     |
| Antipsychotic                                                              |                                                        |                                                                                                            |                    | N05A                                     |
| Anxiolytic, hypnotic or sedative                                           |                                                        |                                                                                                            |                    | N05B N05C                                |
| Antiepileptic                                                              |                                                        |                                                                                                            |                    | N03A                                     |
| <b>Other characteristics</b>                                               | <b>Source</b>                                          | <b>Note</b>                                                                                                |                    |                                          |
| <sup>§</sup> Age                                                           | National Registry                                      | Only month and year of birth available – assumed that all participants were born on day 15 of birth month. |                    |                                          |
| County of residence                                                        | National Registry                                      | Østfold, Akershus, Oslo, Hedmark, Oppland, Buskerud, Vestfold, Telemark, Aust-Agder, Vest-Agder, Rogaland, |                    |                                          |

|                                             |                                 |                                                                                                                                                         |
|---------------------------------------------|---------------------------------|---------------------------------------------------------------------------------------------------------------------------------------------------------|
|                                             |                                 | Hordaland, Sogn og Fjordane, Møre og Romsdal, Sør-Trøndelag, Nord-Trøndelag, Nordland, Troms, Finnmark                                                  |
| <sup>§</sup> Sex                            | National Registry               |                                                                                                                                                         |
| OAC initiated at hospital                   | Norwegian Prescription Database | ICD10 reimbursement code for atrial fibrillation (I48) on first oral anticoagulant dispensing. (Primary care physicians use ICPC2 reimbursement codes.) |
| <sup>§</sup> Year OAC initiated             | Norwegian Prescription Database |                                                                                                                                                         |
| Number of drugs dispensed last 6 months     | Norwegian Prescription Database | 0-4, 5-9, 10-14, 15-                                                                                                                                    |
| Number of hospital admissions last 6 months | Norwegian Patient Registry      | 0, 1, 2-                                                                                                                                                |
| Number of outpatient visits last 6 months   | Norwegian Patient Registry      | 0, 1, 2-                                                                                                                                                |

§: Covariates used in partially adjusted model

ICD-10: International Classification of Diseases, 10th revision

ICPC-2: International Classification of Primary Care, 2nd Edition

TIA: Transient ischemic attack

OAC: Oral anticoagulation
