# Supplementary material for: Comparative effectiveness of warfarin, dabigatran, rivaroxaban and apixaban in non-valvular atrial fibrillation: A nationwide pharmacoepidemiological study
Source: PubMed Central journal article supplement (PMC6709911; doi:10.1371/journal.pone.0221500), 2019-08-26
Supplement: pone.0221500.s009.pdf [file pone.0221500.s009.pdf]

**S4 Table.** Calculation of CHA<sub>2</sub>DS<sub>2</sub>-VASC and modified HAS-BLED risk scores from variables in S3 Table

| <b>Risk score</b>                         | <b>Variable</b>                                                                       | <b>Points</b> |
|-------------------------------------------|---------------------------------------------------------------------------------------|---------------|
| <b>CHA<sub>2</sub>DS<sub>2</sub>-VASC</b> | Congestive heart failure                                                              | 1             |
|                                           | Hypertension                                                                          | 1             |
|                                           | Age ≥75 years                                                                         | 2             |
|                                           | Diabetes mellitus                                                                     | 1             |
|                                           | Previous ischemic stroke, TIA or systemic embolism                                    | 2             |
|                                           | History of acute myocardial infarction or atherosclerosis/peripheral vascular disease | 1             |
|                                           | Age 65-74 years                                                                       | 1             |
|                                           | Female sex                                                                            | 1             |
| <b>Modified HAS-BLED</b>                  | Hypertension                                                                          | 1             |
|                                           | Abnormal liver function                                                               | 1             |
|                                           | Abnormal renal function                                                               | 1             |
|                                           | Previous ischemic stroke, TIA or systemic embolism                                    | 1             |
|                                           | History of intracranial, gastrointestinal or other bleeding                           | 1             |
|                                           | Age >65 years                                                                         | 1             |
|                                           | Concomitant use of NSAID, ASA or platelet aggregation inhibitor                       | 1             |
|                                           | Alcohol misuse                                                                        | 1             |
