# Supplementary material for: Comparative effectiveness of warfarin, dabigatran, rivaroxaban and apixaban in non-valvular atrial fibrillation: A nationwide pharmacoepidemiological study
Source: PubMed Central journal article supplement (PMC6709911; doi:10.1371/journal.pone.0221500), 2019-08-26
Supplement: pone.0221500.s010.pdf [file pone.0221500.s010.pdf]

**S5 Table.** Results of sensitivity analyses on primary effectiveness outcome

| Outcome                                                         | Model                                                              | Oral anticoagulant | Median days of follow-up (min-max) | No. of events | Incidence rate (per 100 person years) | Hazard ratio (95% confidence interval) |                    |                  |
|-----------------------------------------------------------------|--------------------------------------------------------------------|--------------------|------------------------------------|---------------|---------------------------------------|----------------------------------------|--------------------|------------------|
|                                                                 |                                                                    |                    |                                    |               |                                       | Crude                                  | Partially adjusted | Fully adjusted   |
| Ischemic stroke, transient ischemic attack or systemic embolism | rWTD 50 <sup>th</sup> percentile interarrival density <sup>a</sup> | Warfarin           | 114 (1-365)                        | 85            | 3.34                                  | 1                                      | 1                  | 1                |
|                                                                 |                                                                    | Dabigatran         | 97 (1-365)                         | 68            | 3.63                                  | 0.95                                   | 1.03 (0.74-1.43)   | 1.05 (0.74-1.49) |
|                                                                 |                                                                    | Rivaroxaban        | 89 (1-365)                         | 99            | 4.73                                  | 1.18                                   | 1.13 (0.84-1.52)   | 1.14 (0.84-1.56) |
|                                                                 |                                                                    | Apixaban           | 54 (1-365)                         | 108           | 6.23                                  | 1.21                                   | 1.12 (0.82-1.52)   | 1.04 (0.75-1.44) |
|                                                                 | rWTD 60 <sup>th</sup> percentile interarrival density <sup>a</sup> | Warfarin           | 138 (1-365)                        | 93            | 3.15                                  | 1                                      | 1                  | 1                |
|                                                                 |                                                                    | Dabigatran         | 118 (1-365)                        | 74            | 3.21                                  | 0.93                                   | 1.01 (0.74-1.38)   | 1.04 (0.74-1.44) |
|                                                                 |                                                                    | Rivaroxaban        | 96 (1-365)                         | 109           | 4.24                                  | 1.17                                   | 1.13 (0.85-1.50)   | 1.16 (0.86-1.56) |
|                                                                 |                                                                    | Apixaban           | 63 (1-365)                         | 114           | 5.39                                  | 1.13                                   | 1.03 (0.77-1.39)   | 0.98 (0.71-1.34) |
|                                                                 | rWTD 70 <sup>th</sup> percentile interarrival density <sup>a</sup> | Warfarin           | 169 (1-365)                        | 102           | 3.02                                  | 1                                      | 1                  | 1                |
|                                                                 |                                                                    | Dabigatran         | 143 (1-365)                        | 78            | 2.81                                  | 0.88                                   | 0.97 (0.72-1.31)   | 0.99 (0.72-1.35) |
|                                                                 |                                                                    | Rivaroxaban        | 112 (1-365)                        | 119           | 3.71                                  | 1.12                                   | 1.11 (0.84-1.45)   | 1.11 (0.84-1.48) |
|                                                                 |                                                                    | Apixaban           | 76 (1-365)                         | 133           | 4.90                                  | 1.15                                   | 1.07 (0.81-1.41)   | 1.01 (0.75-1.35) |
|                                                                 | rWTD 80 <sup>th</sup> percentile interarrival density <sup>a</sup> | Warfarin           | 204 (1-365)                        | 110           | 2.91                                  | 1                                      | 1                  | 1                |
|                                                                 |                                                                    | Dabigatran         | 171 (1-365)                        | 85            | 2.67                                  | 0.88                                   | 0.99 (0.74-1.32)   | 1.02 (0.75-1.38) |
|                                                                 |                                                                    | Rivaroxaban        | 138 (1-365)                        | 131           | 3.57                                  | 1.14                                   | 1.14 (0.88-1.47)   | 1.15 (0.88-1.51) |
|                                                                 |                                                                    | Apixaban           | 102 (1-365)                        | 158           | 4.14                                  | 1.15                                   | 1.09 (0.84-1.41)   | 1.03 (0.78-1.36) |
|                                                                 | rWTD 99 <sup>th</sup> percentile interarrival density <sup>a</sup> | Warfarin           | 322 (1-365)                        | 137           | 3.00                                  | 1                                      | 1                  | 1                |
|                                                                 |                                                                    | Dabigatran         | 288 (1-365)                        | 95            | 2.38                                  | 0.77                                   | 0.88 (0.67-1.15)   | 0.93 (0.70-1.22) |
|                                                                 |                                                                    | Rivaroxaban        | 205 (1-365)                        | 157           | 3.48                                  | 1.08                                   | 1.08 (0.86-1.37)   | 1.13 (0.88-1.44) |
|                                                                 |                                                                    | Apixaban           | 203 (1-365)                        | 206           | 3.47                                  | 1.06                                   | 1.01 (0.81-1.28)   | 1.00 (0.78-1.27) |
|                                                                 | Fixed daily dose model <sup>b</sup>                                | Warfarin           | 167 (1-365)                        | 100           | 2.93                                  | 1                                      | 1                  | 1                |
|                                                                 |                                                                    | Dabigatran         | 215 (1-365)                        | 86            | 2.40                                  | 0.86                                   | 0.97 (0.72-1.30)   | 1.02 (0.75-1.39) |
|                                                                 |                                                                    | Rivaroxaban        | 223 (1-365)                        | 173           | 3.66                                  | 1.32                                   | 1.27 (0.99-1.63)   | 1.33 (1.02-1.72) |
|                                                                 |                                                                    | Apixaban           | 174 (1-365)                        | 193           | 3.53                                  | 1.20                                   | 1.11 (0.86-1.44)   | 1.09 (0.83-1.42) |
|                                                                 | Only main diagnosis events <sup>c</sup>                            | Warfarin           | 250 (1-365)                        | 98            | 2.35                                  | 1                                      | 1                  | 1                |
|                                                                 |                                                                    | Dabigatran         | 212 (1-365)                        | 61            | 1.71                                  | 0.70                                   | 0.83 (0.60-1.15)   | 0.81 (0.57-1.14) |
|                                                                 |                                                                    | Rivaroxaban        | 165 (1-365)                        | 95            | 2.35                                  | 0.93                                   | 0.95 (0.71-1.26)   | 0.92 (0.68-1.24) |
|                                                                 |                                                                    | Apixaban           | 151 (1-365)                        | 125           | 2.46                                  | 0.93                                   | 0.89 (0.67-1.18)   | 0.80 (0.60-1.08) |

<sup>a</sup> Prescription length estimated in reverse parametric waiting time distribution (rWTD) model with 50<sup>th</sup>, 60<sup>th</sup>, 70<sup>th</sup>, 80<sup>th</sup> or 99<sup>th</sup> percentile interarrival density adjusted for sex, age and number of pills. No gap in supply allowed.

<sup>b</sup> Prescription length based on recommended dose for DOACs and an estimate of mean daily dose of warfarin used by the study population. Up to 30-day gap in supply allowed.

<sup>c</sup> Only events registered as primary diagnosis included in outcome (excluding events registered as secondary diagnosis or underlying cause of death). Otherwise same model as main analyses.
