# Supplementary material for: Comparative effectiveness of warfarin, dabigatran, rivaroxaban and apixaban in non-valvular atrial fibrillation: A nationwide pharmacoepidemiological study
Source: PubMed Central journal article supplement (PMC6709911; doi:10.1371/journal.pone.0221500), 2019-08-26
Supplement: pone.0221500.s012.pdf [file pone.0221500.s012.pdf]

**S7 Table.** Results of sensitivity analysis on negative control outcome

| Outcome   | Model                         | Oral anticoagulant | Median days of follow-up (min-max) | No. of events | Incidence rate (per 100 person years) | Hazard ratio (95% confidence interval) |                    |                  |
|-----------|-------------------------------|--------------------|------------------------------------|---------------|---------------------------------------|----------------------------------------|--------------------|------------------|
|           |                               |                    |                                    |               |                                       | Crude                                  | Partially adjusted | Fully adjusted   |
| Pneumonia | Negative control <sup>a</sup> | Warfarin           | 243 (1-365)                        | 306           | 7.48                                  | 1                                      | 1                  | 1                |
|           |                               | Dabigatran         | 210 (1-365)                        | 148           | 4.18                                  | 0.55                                   | 0.79 (0.65-0.97)   | 0.91 (0.74-1.12) |
|           |                               | Rivaroxaban        | 162 (1-365)                        | 194           | 4.83                                  | 0.62                                   | 0.80 (0.66-0.96)   | 0.85 (0.70-1.03) |
|           |                               | Apixaban           | 149 (1-365)                        | 324           | 6.45                                  | 0.80                                   | 0.90 (0.77-1.07)   | 0.91 (0.76-1.09) |

<sup>a</sup> Same model as the main analyses with hospitalization or death from pneumonia as a negative control outcome to indirectly test for residual confounding.
